# Supplementary material
Source: Royal Society of Chemistry journal article supplement (doi:10.1039/d6nj00652c)
Supplement: d6nj00652c2.pdf [file d6nj00652c2.pdf]

**Supplementary Table ST1:** Binding energy for the Ni2P, Fe2P, Zn2P, O1s of NiFe<sub>2</sub>O<sub>4</sub> and ZnFe<sub>2</sub>O<sub>4</sub>

| Elements         |                                       | NF        | ZF        |
|------------------|---------------------------------------|-----------|-----------|
|                  |                                       | B.E. (eV) | B.E. (eV) |
| Fe <sub>2p</sub> | Fe2P <sub>3/2</sub> (O <sub>h</sub> ) | 706.15    | 706.91    |
|                  | Fe2P <sub>3/2</sub> (T <sub>h</sub> ) | 708.48    | -         |
|                  | Satellite peak                        | 714.13    | 714.51    |
|                  | Fe2P <sub>1/2</sub> (O <sub>h</sub> ) | 719.52    | 720.76    |
|                  | Fe2P <sub>1/2</sub> (T <sub>h</sub> ) | 722.11    | -         |
|                  | Satellite peak                        | 728.87    | 728.72    |
| Ni <sub>2p</sub> | Ni2P <sub>3/2</sub> (O <sub>h</sub> ) | 850.32    | -         |
|                  | Satellite peak                        | 857.4     | -         |
|                  | Ni2P <sub>1/2</sub> (O <sub>h</sub> ) | 868.40    | -         |
|                  | Satellite peak                        | 875.48    | -         |
| Zn <sub>2p</sub> | Zn2P <sub>3/2</sub>                   | -         | 1017.39   |
|                  | Zn2P <sub>1/2</sub>                   | -         | 1040.63   |
| O <sub>1s</sub>  | -                                     | 525.46    | 525.24    |
|                  |                                       | 526.9     | 526.6     |
|                  |                                       | 529.36    | 528.77    |
|                  |                                       | -         | 532.1     |

**Supplementary Table ST2:** EIS fitting parameters of samples NF and ZF symmetric and ASC devices.

| <b>Sample<br/>x</b>   | <b>Parameters</b>                          | <b>Fresh<br/>electrode</b> | <b>After 1000<br/>cycles</b>  |
|-----------------------|--------------------------------------------|----------------------------|-------------------------------|
| <b>NF<br/>Sym.</b>    | <b>Rs (<math>\Omega</math>)</b>            | 0.78                       | 1.0                           |
|                       | <b>Rct (<math>\Omega</math>)</b>           | 2.40                       | 2.5                           |
|                       | <b>R<sub>1</sub> (<math>\Omega</math>)</b> | 0.78                       | 1.01                          |
|                       | <b>R<sub>2</sub> (<math>\Omega</math>)</b> | 1.41                       | 1.26                          |
|                       | <b>W1 (<math>\Omega/s^{0.5}</math>)</b>    | 0.054                      | 1.12x10 <sup>-1</sup>         |
|                       | <b>Q1 (<math>s^N/\Omega</math>)</b>        | 1.59x10 <sup>-4</sup>      | 3.04x10 <sup>-4</sup>         |
|                       | <b>N1</b>                                  | 9.57x10 <sup>-1</sup>      | 9.44x10 <sup>-1</sup>         |
|                       | <b>Q2(<math>s^N/\Omega</math>)</b>         | 1.27x10 <sup>-2</sup>      | 1.76x10 <sup>-2</sup>         |
|                       | <b>N2</b>                                  | 7.27x10 <sup>-1</sup>      | 7.0x10 <sup>-1</sup>          |
| <b>ZF<br/>Sym.</b>    | <b>Rs (<math>\Omega</math>)</b>            | 0.72                       | 0.8                           |
|                       | <b>Rct (<math>\Omega</math>)</b>           | 5.51                       | 7.38                          |
|                       | <b>R<sub>1</sub> (<math>\Omega</math>)</b> | 7.7x10 <sup>-1</sup>       | 0.83                          |
|                       | <b>R<sub>2</sub> (<math>\Omega</math>)</b> | 5.18                       | 6.45                          |
|                       | <b>W1 (<math>\Omega/s^{0.5}</math>)</b>    | 1.4x10 <sup>-2</sup>       | 1.23x10 <sup>-1</sup>         |
|                       | <b>Q1(<math>s^N/\Omega</math>)</b>         | 4.86x10 <sup>-4</sup>      | 3.24x10 <sup>-3</sup>         |
|                       | <b>N1</b>                                  | 8.7x10 <sup>-1</sup>       | 7.11x10 <sup>-1</sup>         |
|                       | <b>Q2(<math>s^N/\Omega</math>)</b>         | -                          | 3.76x10 <sup>-1</sup>         |
|                       | <b>N2</b>                                  | -                          | 1.1                           |
| <b>Sample<br/>x</b>   | <b>Parameters</b>                          | <b>Fresh<br/>electrode</b> | <b>After 10000<br/>cycles</b> |
| <b>NF//ZF<br/>ASC</b> | <b>Rs (<math>\Omega</math>)</b>            | 2.61                       | 3.0                           |
|                       | <b>Rct (<math>\Omega</math>)</b>           | 2.83                       | 3.55                          |
|                       | <b>R<sub>1</sub> (<math>\Omega</math>)</b> | 2.4                        | 2.72                          |
|                       | <b>R<sub>2</sub> (<math>\Omega</math>)</b> | 50.9                       | 50.0                          |
|                       | <b>W1 (<math>\Omega/s^{0.5}</math>)</b>    | 9.53x10 <sup>-3</sup>      | 9.66x10 <sup>-3</sup>         |
|                       | <b>Q1(<math>s^N/\Omega</math>)</b>         | 1.1x10 <sup>-2</sup>       | 1.25x10 <sup>-2</sup>         |
|                       | <b>N1</b>                                  | 0.71                       | 0.7                           |
|                       | <b>Q2(<math>s^N/\Omega</math>)</b>         | 14.6                       | 5.56                          |
|                       | <b>N2</b>                                  | 1.1                        | 1.1                           |
